# Supplementary material for: In situ formation of J-aggregate in the tumor microenvironment using acidity responsive polypeptide nanoparticle encapsulating galactose-conjugated BODIPY dye for NIR-II phototheranostics
Source: Royal Society of Chemistry journal article supplement (doi:10.1039/d2tb00705c), 2022-01-01
Supplement: d2tb00705c1.pdf [file d2tb00705c1.pdf]

Supporting Information for

**In situ Formation of J-Aggregate in Tumor Microenvironment Using  
Acidity-Responsive Polypeptide Nanoparticles Encapsulating  
Galactose Conjugated BODIPY Dye for NIR-II Phototheranostics**

Huiping Dang, Dalong Yin, Youliang Tian, Quan Cheng, Changchang Teng, Yixuan

Xu, Lifeng Yan \*

Department of Hepatobiliary Surgery, The First Affiliated Hospital, Division of  
Life Sciences and Medicine, and Department of Chemical Physics, University of

Science and Technology of China, Hefei, 230026, China.

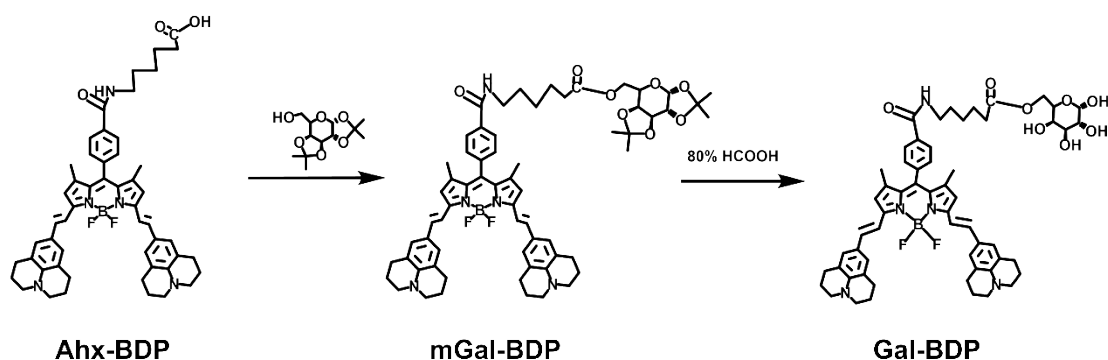

**Figure S1.** Synthesis of Gal-BDP.

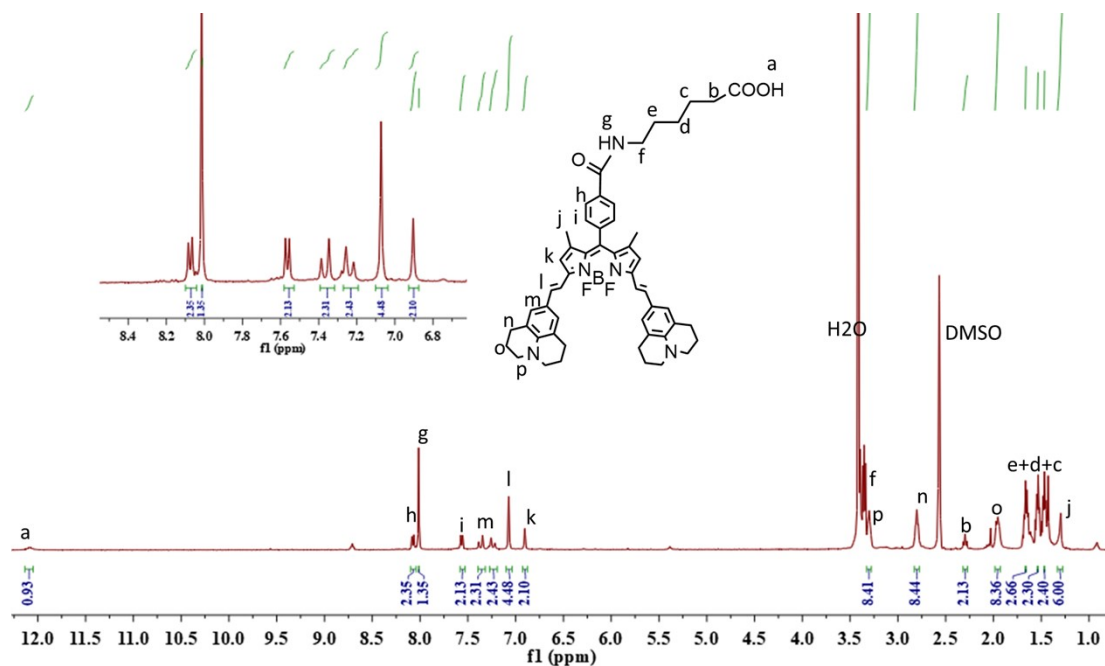

Figure S2.  $^1\text{H}$  NMR spectrum of Ahx-BDP.

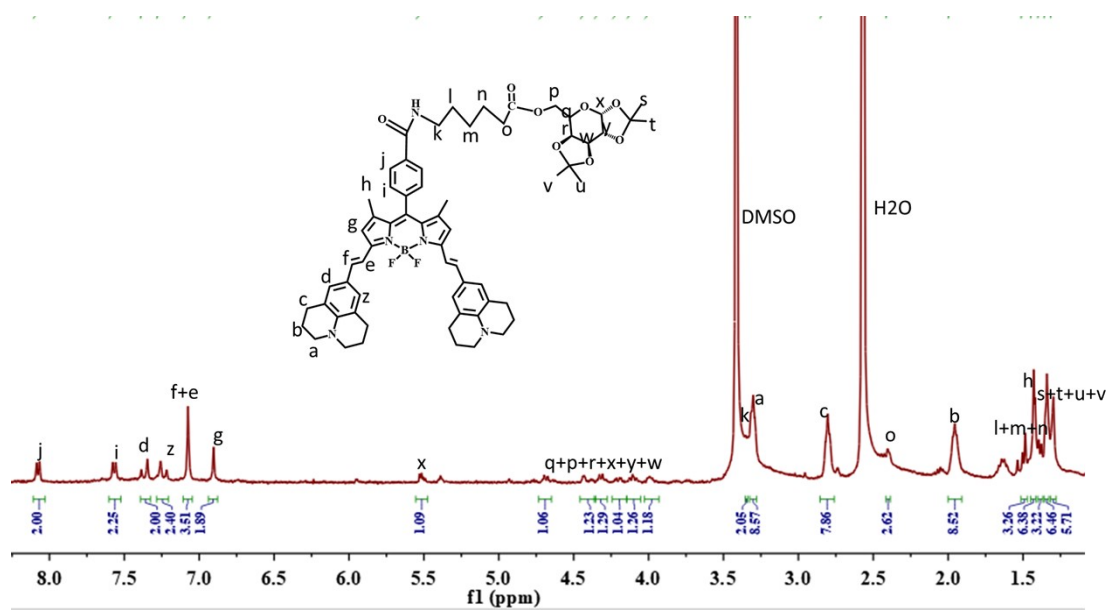

Figure S3.  $^1\text{H}$  NMR spectrum of mGal-BDP.

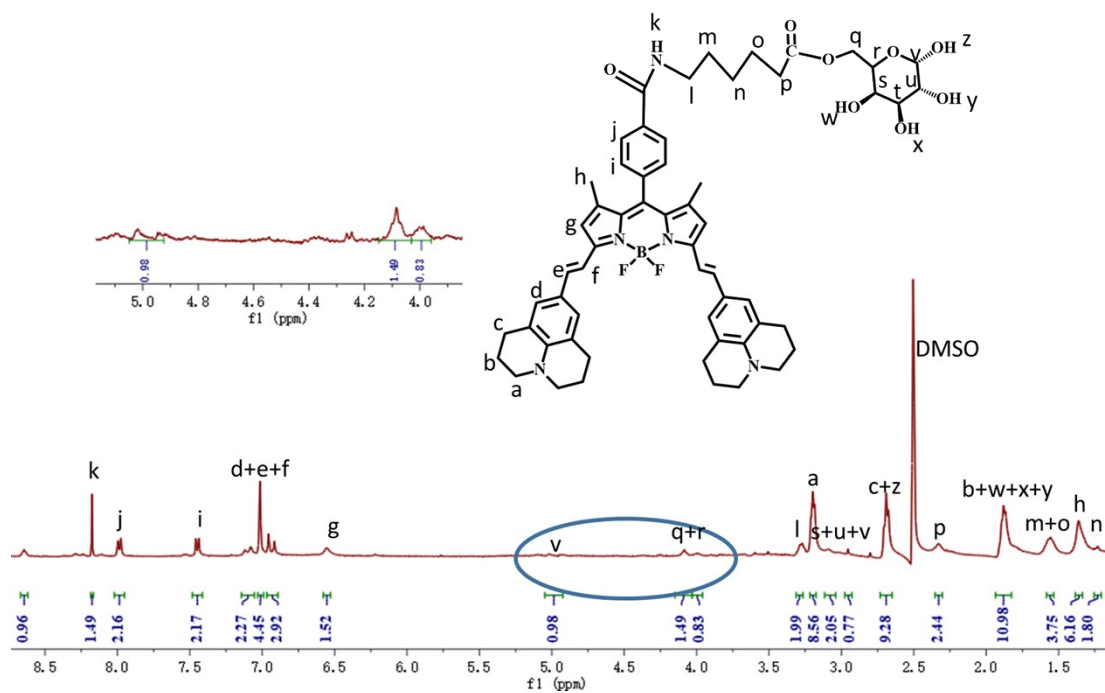

Figure S4.  $^1\text{H}$  NMR spectrum of Gal-BDP.

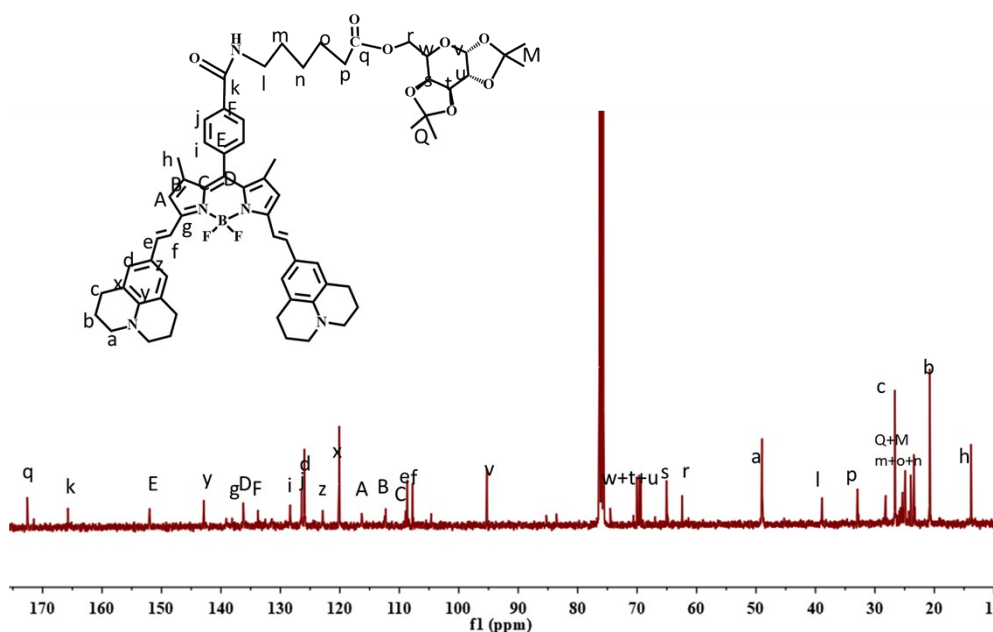

Figure S5.  $^{13}\text{C}$  NMR spectrum of mGal-BDP.

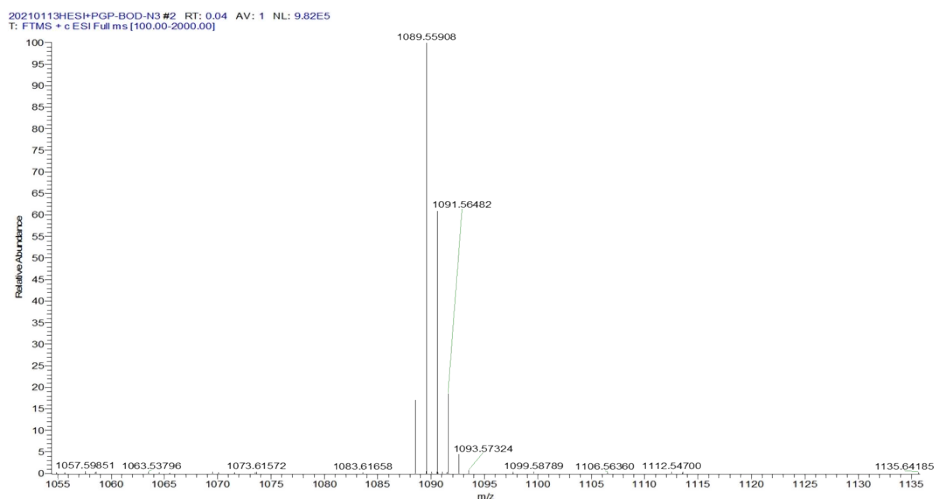

**Figure S6.** Mass spectra (ESI) of mGal-BDP.

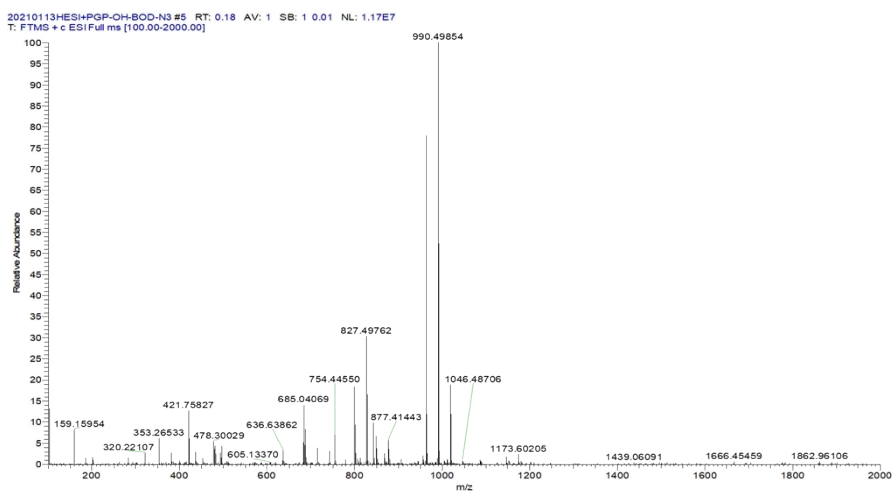

**Figure S7.** Mass spectra (ESI) of Gal-BDP.

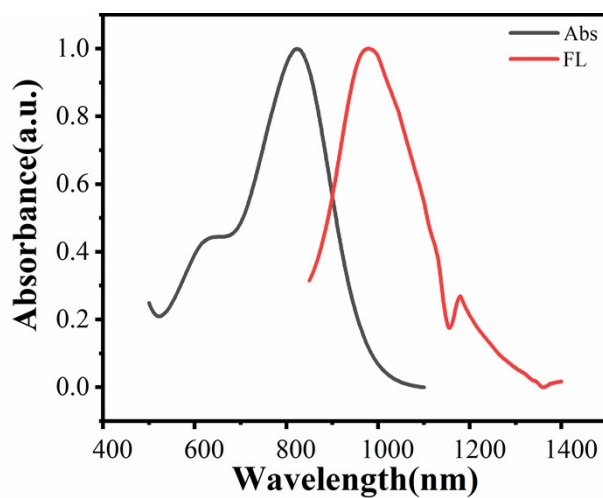

**Figure S8.** Gal-BDP absorption and emission spectra in DCM.

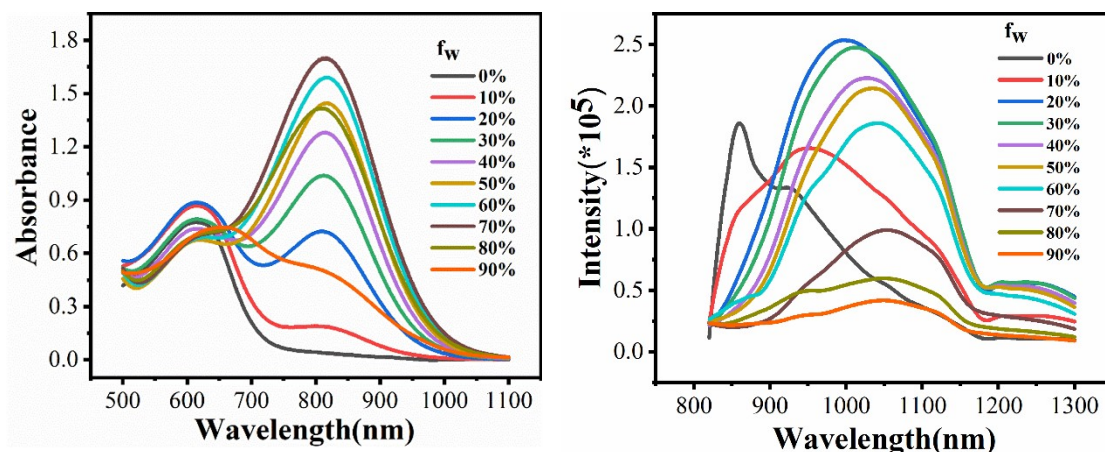

Figure S9. Gal-BDP absorption(left) and emission(right) spectra in in THF-H<sub>2</sub>O.

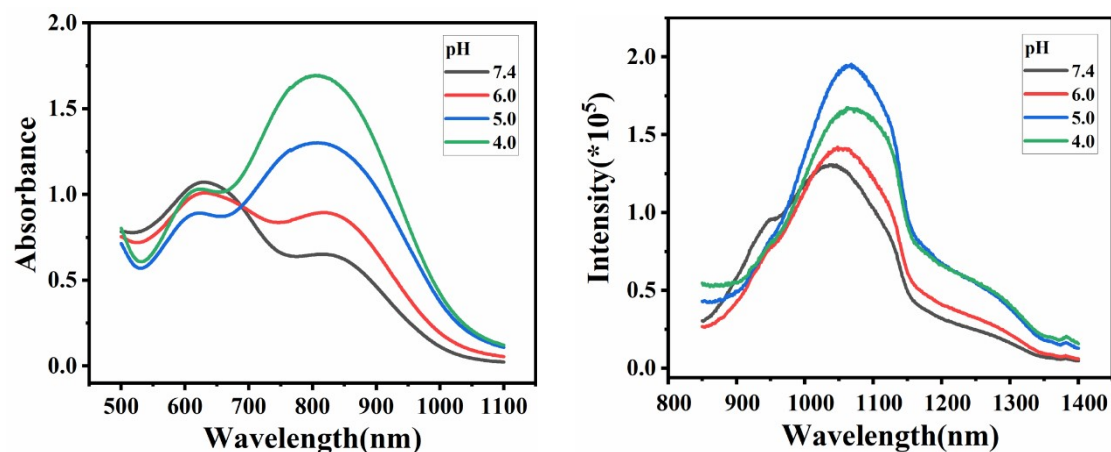

Figure S10. Changes of Gal-BDP absorption(left) and emission(right) spectra in different pH buffers.

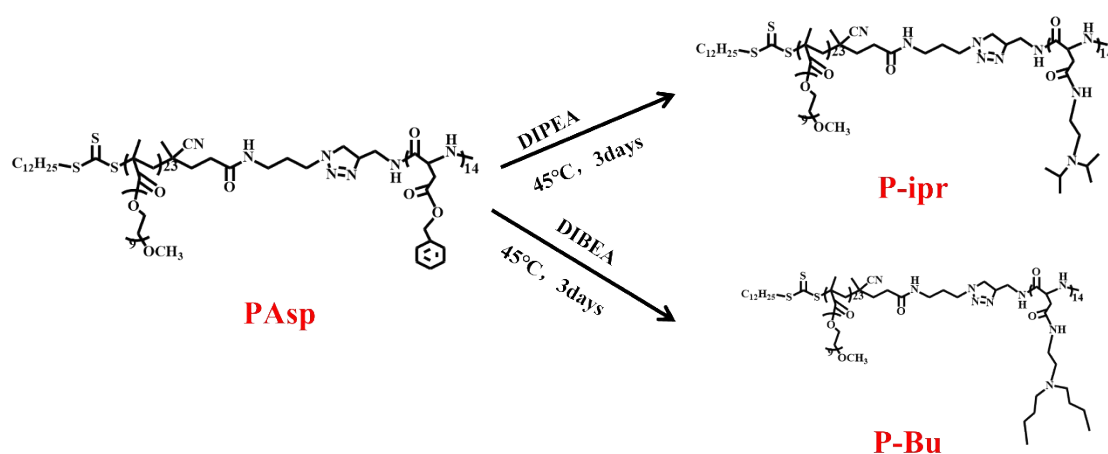

Figure S11. Polymer synthesis.

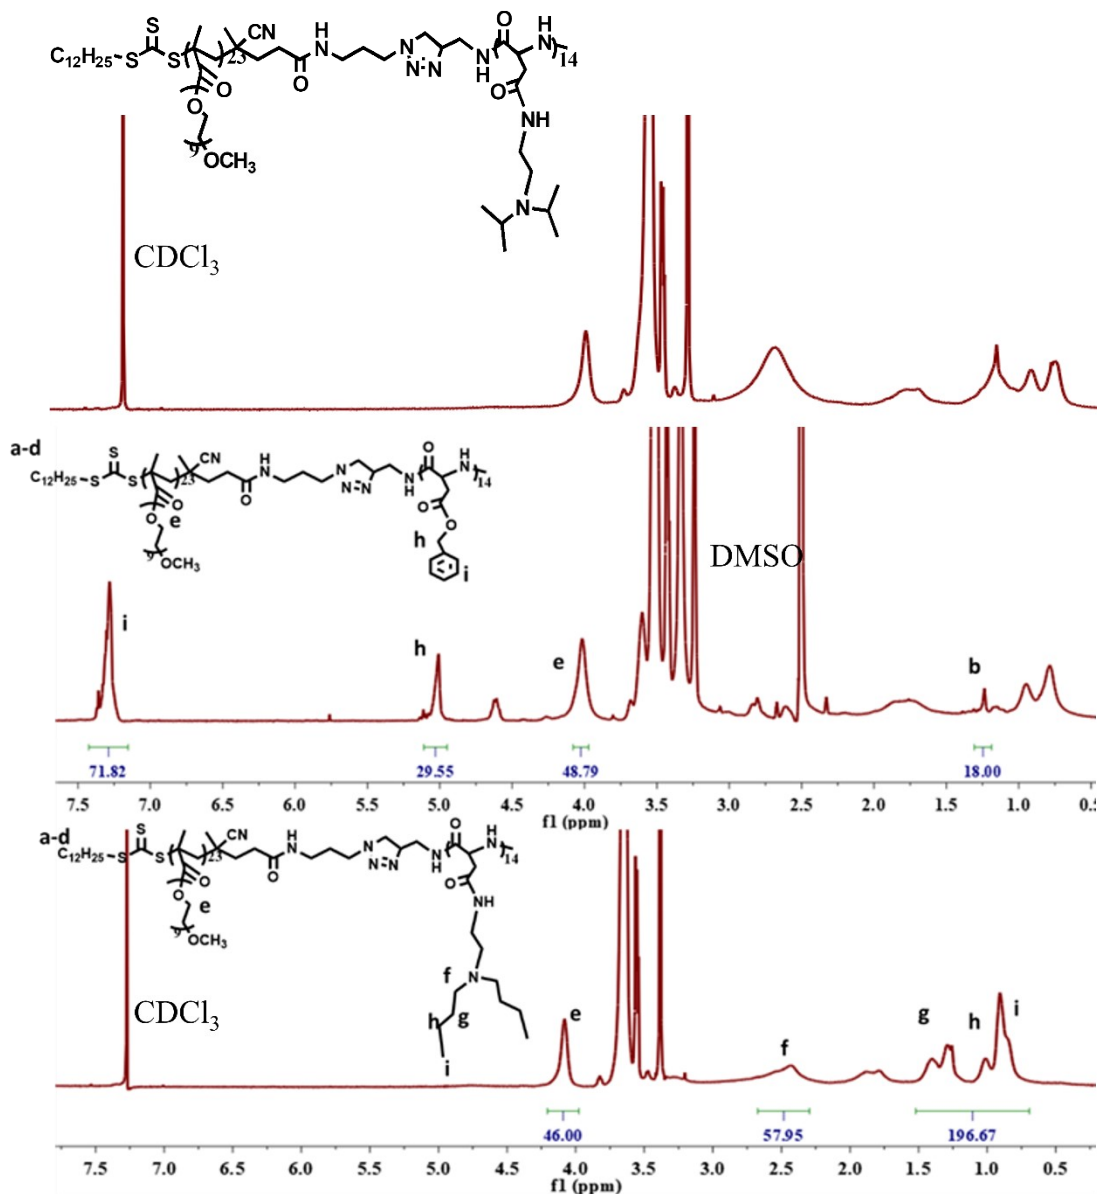

Figure S12.  $^1\text{H}$  NMR spectrum of polymer.

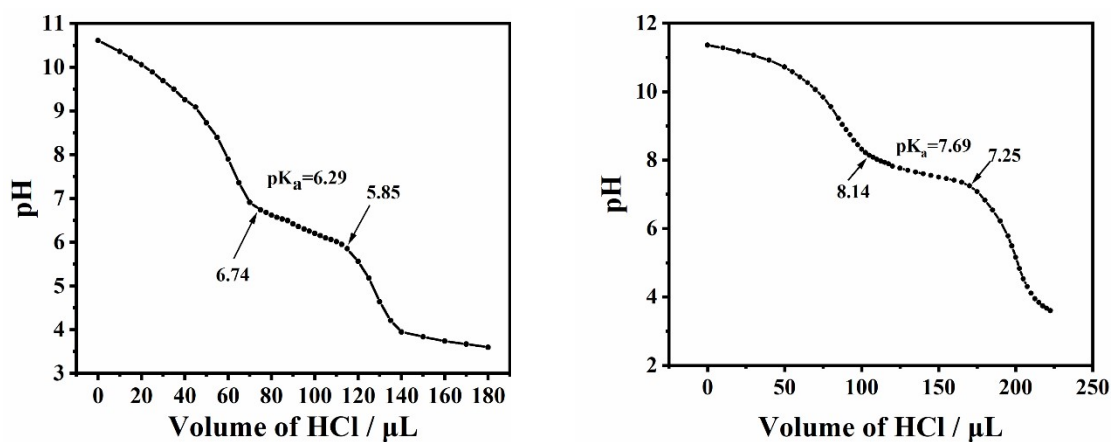

Figure S13. Titration curves of pH-sensitive P-ivr (left) and P-Bu (right) copolymers.

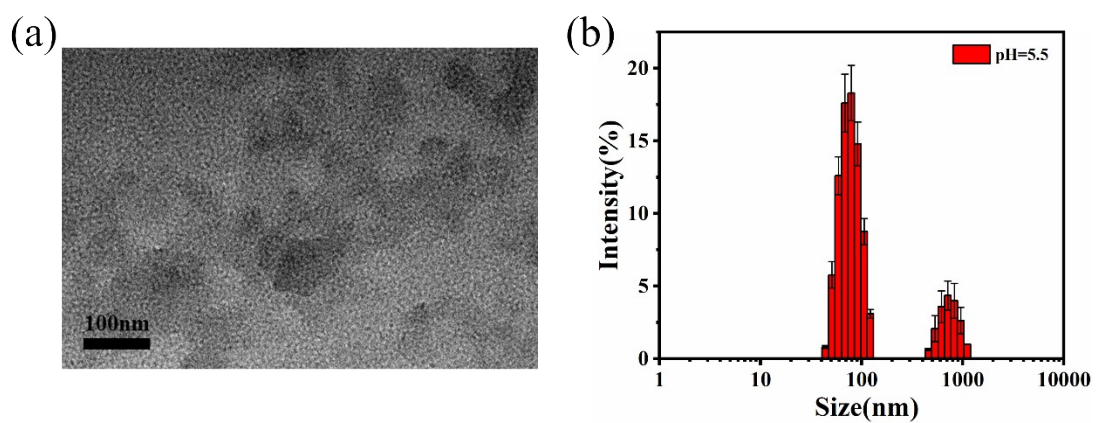

**Figure S14.** The TEM morphology(a) and DLS intensity distribution(b) of P-ivr@Gal NPs in pH = 5.5.

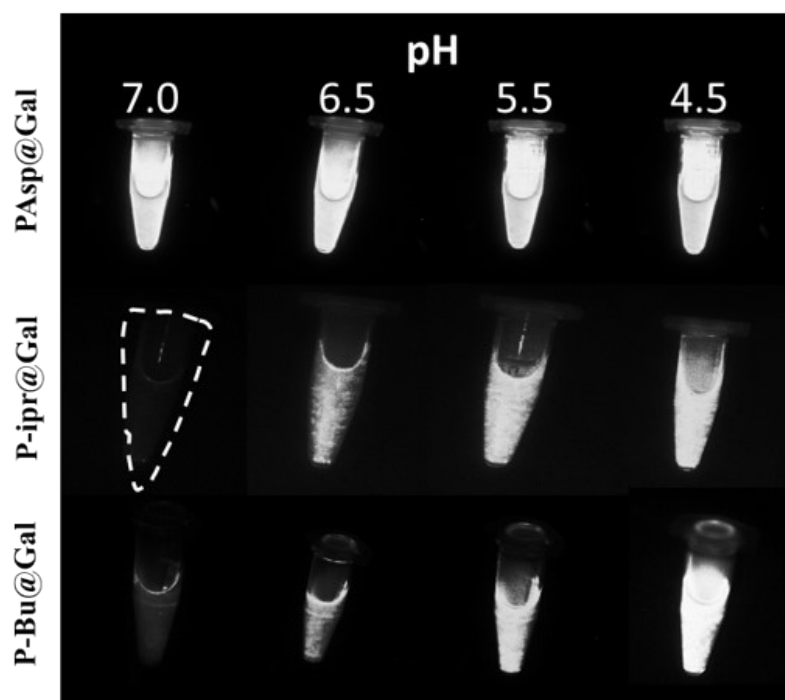

**Figure S15.** Fluorescence imaging of different nanoparticle solutions in different pH buffers.

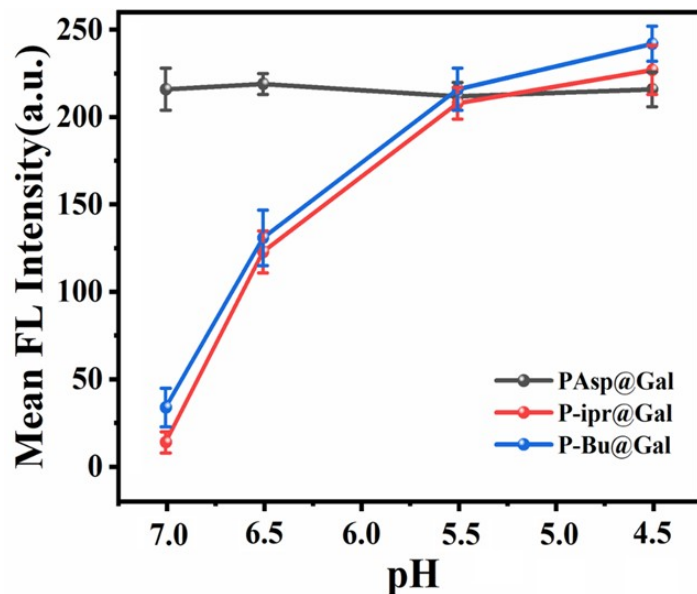

**Figure S16.** The quantitative variation of fluorescence brightness with pH.

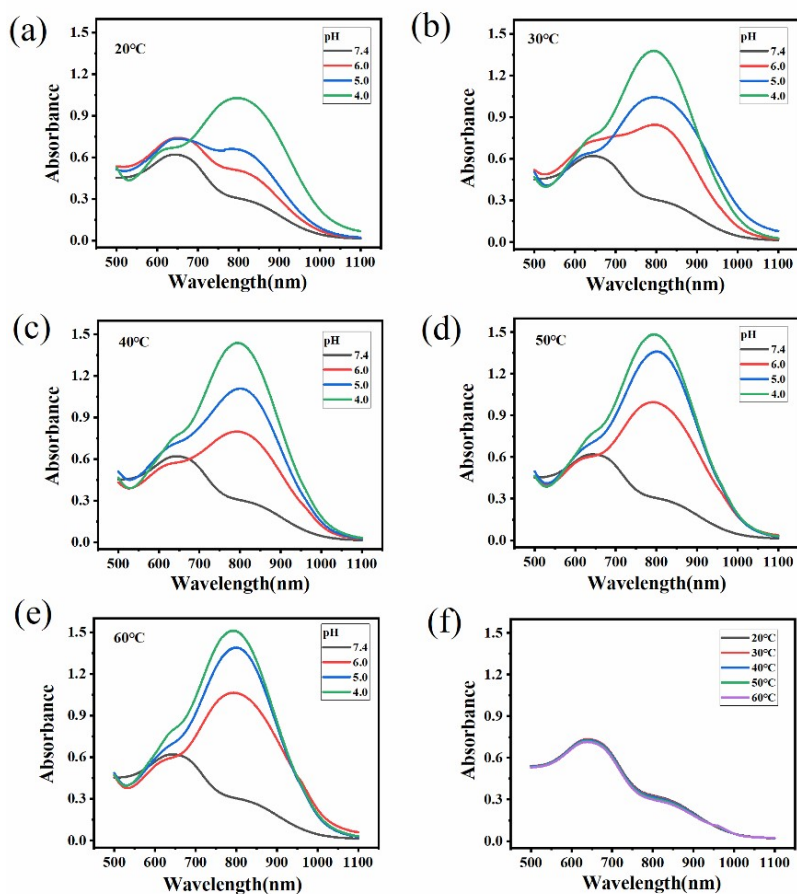

**Figure S17.** The absorption spectra changes in different pH buffers at 20°C (a), 30°C (b), 40°C (c), 50°C (d), 60°C (e), respectively, and the thermal stability (f) of P-ivr@Gal.



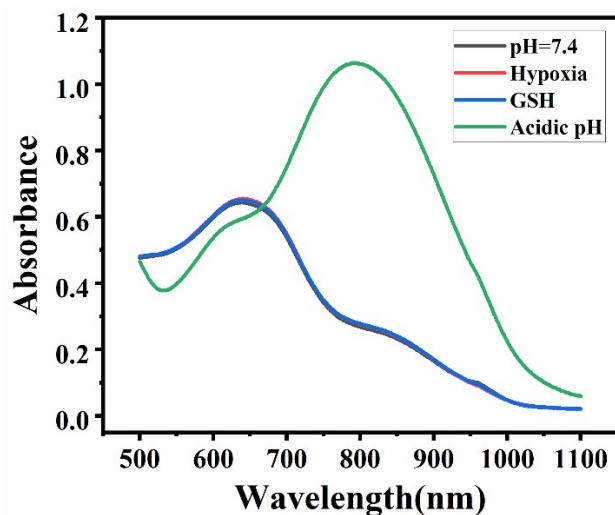

**Figure S18.** The absorption spectra of P-ivr@Gal nanoparticle in tumor microenvironment conditions.

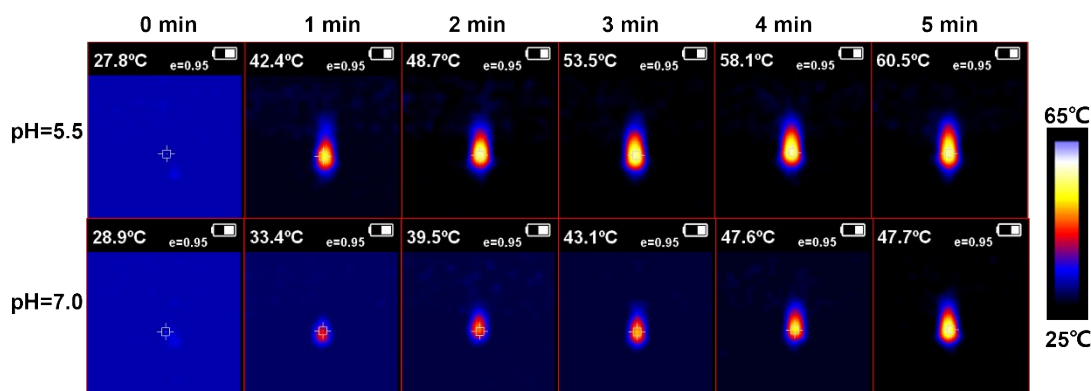

**Figure S19.** Infrared thermal images of P-ivr@Gal ( $30 \times 10^{-6} \text{M}$ ) during 5 minutes of irradiation by 808 nm laser ( $1 \text{ W cm}^{-2}$ ).

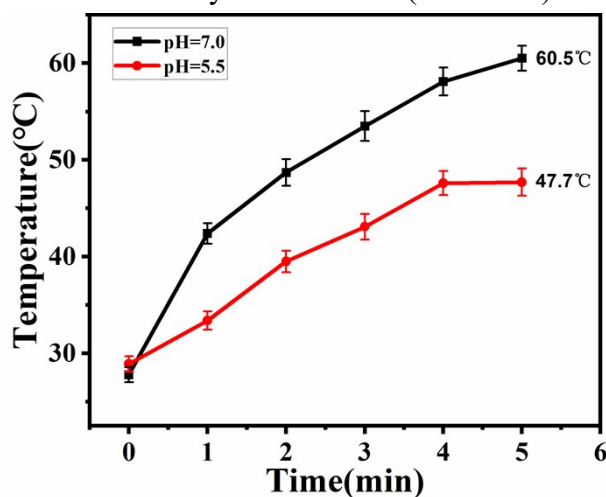

**Figure S20.** Corresponding temperature changes of P-ivr@Gal during the irradiation of 808 nm laser, the data are shown as mean  $\pm$  SD ( $n = 3$ ).

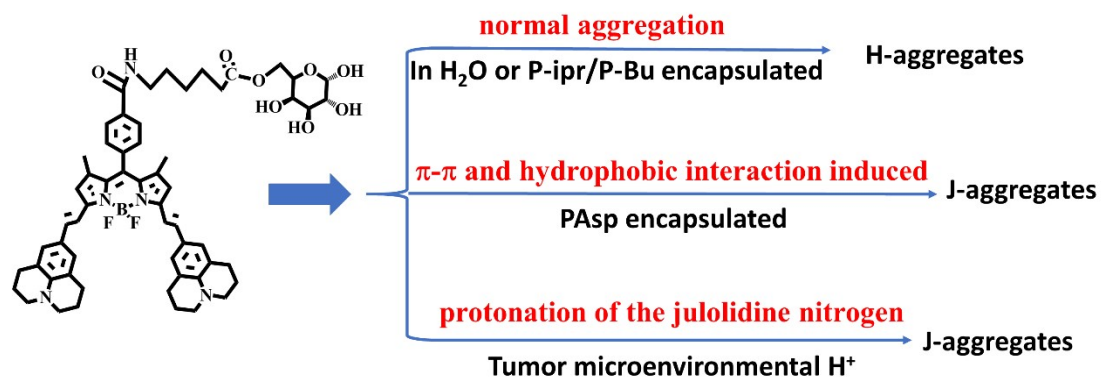

**Figure S21.** Aggregates of Gal-BDP under different environments.
